# Supplementary material
Source: PubMed Central journal article supplement (PMC7540123)
Supplement: ajtr0012-5908-f8.pdf [file ajtr0012-5908-f8.pdf]

CD47 antibody in cardiac hypertrophy

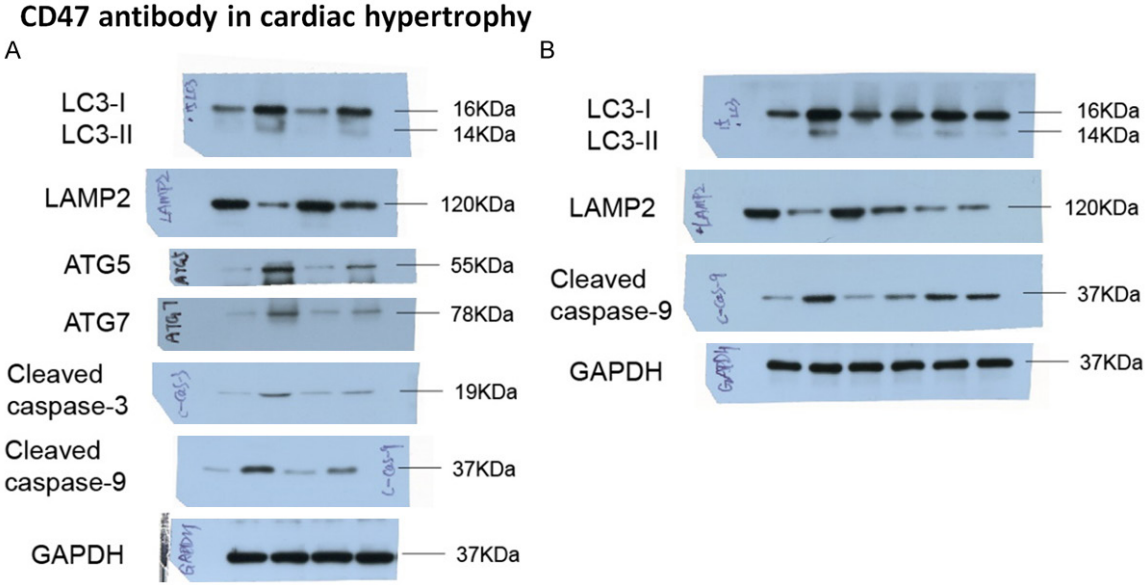

Figure S1. A, B. Original images of Western blots for Figures 6 and 7.
